# Supplementary material
Source: Springer Nature journal article supplement (https://www.springermedizin.de/resource/supplementary/13041_2012_174_MOESM7_ESM.pdf/25657646)

**A**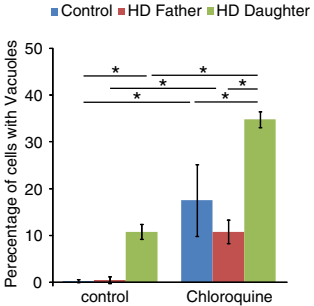**B**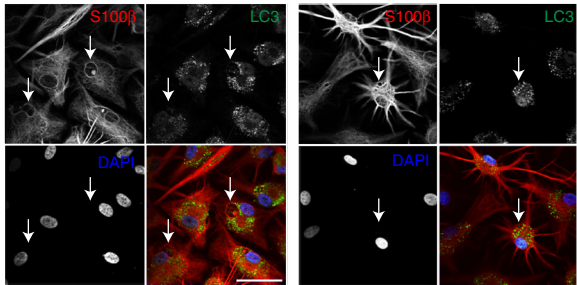

Supplement: MOESM7 [file 25657646]
